# Supplementary material for: Progress in Hexagonal Boron Nitride (h-BN)-Based Solid-State Neutron Detector
Source: MDPI journal article supplement (doi:10.3390/electronicmat3030020), 2022-08-03
Supplement: s1 [file s1]

## Supplementary Information

# Progress in hexagonal boron nitride (h-BN) based solid state neutron detector

Samiul Hasan and Iftikhar Ahmad

<sup>1</sup> Department of Electrical Engineering, University of South Carolina, Columbia, SC 29208, USA

\* Correspondence: author at: University of South Carolina, Columbia, SC 29208, USA; E-mail address: shasan@email.sc.edu, ahmad@cec.sc.edu

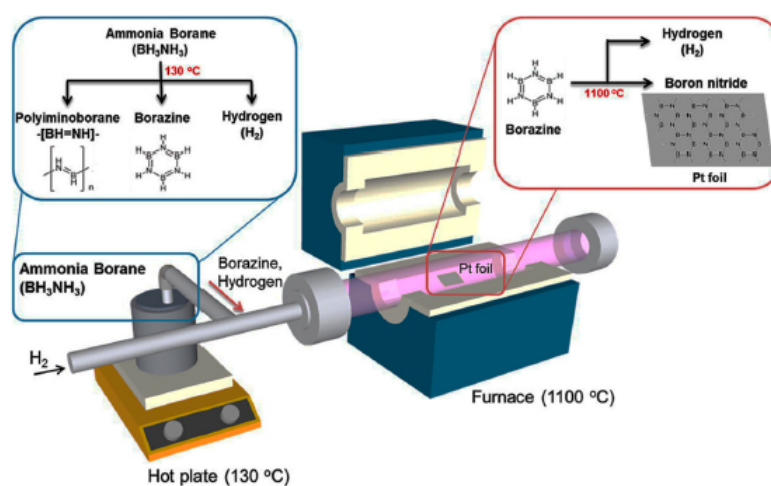

Figure S1. Schematic of a CVD set up for the epitaxy of h-BN. (1)

Adopted from  
"Jana, M.; Singh, R.N. Progress in CVD Synthesis of Layered Hexagonal Boron Nitride with Tunable Properties and Their Applications. Int. Mater. Rev. 2018, 63, 162–203, doi:10.1080/09506608.2017.1322833."
